# Supplementary material for: Cost-Effective and Practical Manual Microdissection Method for Accurate High-Purity Tissue Sampling
Source: Research Square preprint supplement (doi:10.21203/rs.3.rs-5654096/v1), 2025-05-05
Supplement: Supplementary file 1 [file 6e67c82ccad86780ae29825b.docx]

**Supplementary Information**

**Supplementary Figure. 1** The collected sections of the lesion #2 of case 2. There were five dissected sections, which are indicated by red arrows, inside the tube cap with 1 μL deparaffinization solution.

**Supplementary Movie 1.** A movie of step 5. A section of lesion #2 from case 2 was dissected and collected in a tube cap under a stereomicroscope.
