# Supplementary material for: Cost-Effective and Practical Manual Microdissection Method for Accurate High-Purity Tissue Sampling
Source: Research Square preprint supplement (doi:10.21203/rs.3.rs-5654096/v1), 2025-05-05
Supplement: Supplementary file 2 [file 866c6f039d38d8d41970e064.docx]

**Supplementary Table 2.** Sample material and extracted DNA

| **Sample name** | **Sampled area (mm2)** | **Section number** | **Thickness of FFPE section (μm)** | **DNA concentration (ng/μL)** |
| --- | --- | --- | --- | --- |
| Case 1 | 0.0759 | 1 | 15 | 7.7 |
| Case 2 #1 | 0.353 | 1 | 10 | 7.2 |
| Case 2 #2 | 0.443 | 5 | 10 | 15.6 |
| Case 2 #3 | 0.0667 | 1 | 10 | 6.9 |
| Case 2 #4 | 0.114 | 1 | 10 | 7.4 |
| Case 2 #5 | 0.122 | 1 | 10 | 8.8 |
| Case 2 #6 | 0.0898 | 1 | 10 | 10.6 |
| Case 2 #7 | 0.256 | 1 | 10 | 8.6 |
| Case 2 #8 | 0.328 | 1 | 10 | 8.2 |
| Case 2 #9 | 0.354 | 1 | 10 | 8.2 |
| Case 2 #10 | 0.686 | 1 | 10 | 10.1 |
| Case 2 #11 | 0.205 | 1 | 10 | 13.0 |
| Case 3 | 16 | 1 | 10 | 63.8 |

FFPE: formalin-fixed paraffin-embedded
