# Supplementary material for: Cost-Effective and Practical Manual Microdissection Method for Accurate High-Purity Tissue Sampling
Source: Research Square preprint supplement (doi:10.21203/rs.3.rs-5654096/v1), 2025-05-05
Supplement: Supplementary file 3 [file ae735b4e041b87e765f8f809.docx]

**Supplementary Table 1.** Primers used in the analyses

| **Type of primers** | **Sequence** |
| --- | --- |
| KRAS forward primer | 5'- CCTGCTGAAAATGACTGAA -3' |
| KRAS reverse primer | 5'- CAAGATTTACCTCTATTGTTG -3' |
| GNAS forward primer | 5'- CAGACCTTTGCTTTAGATTG -3' |
| GNAS reverse primer | 5'- GTAACAGTTGGCTTACTGGA -3' |
